# Supplementary material
Source: MDPI journal article supplement (https://www.mdpi.com/2073-4395/13/3/636)
Supplement: s1 [file s1]

## Supplementary Material

**Table S1.** Concentration of each oxylipin (PhytoPs) quantified according to salicylic acid dose, and harvest time.

| Factor                                         | 9-F <sub>1t</sub> -PhytoP | <i>ent</i> -16-F <sub>1t</sub> -PhytoP +<br><i>ent</i> -16- <i>epi</i> -16-F <sub>1t</sub> -<br>PhytoP | 9- <i>epi</i> -9-F <sub>1t</sub> -<br>PhytoP | 9- <i>epi</i> -9-D <sub>1t</sub> -<br>PhytoP | 9-D <sub>1t</sub> -PhytoP | 16-B <sub>1</sub> -PhytoP | 9-L <sub>1</sub> -PhytoP |
|------------------------------------------------|---------------------------|--------------------------------------------------------------------------------------------------------|----------------------------------------------|----------------------------------------------|---------------------------|---------------------------|--------------------------|
| <i>Unripe grains</i>                           |                           |                                                                                                        |                                              |                                              |                           |                           |                          |
| Control                                        | 588.8 ± 60.2 a            | 765.0 ± 82.6 a                                                                                         | 525.0 ± 112.2 a                              | 23.3 ± 8.3 a                                 | 109.5 ± 9.8 a             | 19.0 ± 2.1 a              | 13.3 ± 1.3 a             |
| SA1                                            | 510.7 ± 55.7 a            | 652.8 ± 63.3 a                                                                                         | 468.0 ± 67.0 a                               | 10.1 ± 2.3 b                                 | 89.3 ± 9.7 a              | 16.6 ± 1.6 a              | 12.1 ± 1.0 a             |
| SA15                                           | 482.4 ± 60.0 a            | 595.0 ± 71.8 a                                                                                         | 546.4 ± 62.8 a                               | 9.7 ± 1.8 b                                  | 88.5 ± 10.2 a             | 15.8 ± 1.8 a              | 11.0 ± 1.1 a             |
| <i>Mature grains</i>                           |                           |                                                                                                        |                                              |                                              |                           |                           |                          |
| Control                                        | 286.2 ± 52.7 a            | 728.3 ± 129.3 a                                                                                        | 313.1 ± 70.01 a                              | 6.1 ± 0.8 a                                  | 66.6 ± 14.4 a             | 12.8 ± 2.2 a              | 9.4 ± 1.5 a              |
| SA1                                            | 209.5 ± 39.3 a            | 571.9 ± 114.2 ab                                                                                       | 364.6 ± 113.6 a                              | 5.6 ± 0.7 a                                  | 45.8 ± 10.0 ab            | 10.2 ± 2.1 a              | 7.4 ± 1.3 ab             |
| SA15                                           | 186.8 ± 37.8 a            | 442.5 ± 92.5 b                                                                                         | 222.8 ± 65.4 a                               | 4.5 ± 0.6 a                                  | 39.4 ± 6.6 b              | 8.9 ± 1.9 a               | 5.6 ± 0.9 b              |
| <i>Interaction harvest time x SA treatment</i> |                           |                                                                                                        |                                              |                                              |                           |                           |                          |
| <i>p-value</i>                                 | N.s.                      | N.s.                                                                                                   | N.s.                                         | *                                            | N.s.                      | N.s.                      | N.s.                     |

Control, without salicylic acid; SA1 and SA15, application with 1 and 15 mM of salicylic acid. Concentration PhytoPs (ng.g<sup>-1</sup> dw) presented as mean ± SEM (n=3). <sup>x</sup> Values in the same row followed by different letters are significantly different at p<0.05 according to one-way analysis of variance (ANOVA) and multiple range test of Tukey for salicylic acid treatments in unripe and mature grain of three rice genotypes. <sup>y</sup> N.s., no significant, \* significant (p<0.05).

**Table S2.** Concentration of each oxylin (PhytoFs) quantified according to salicylic acid dose, harvest time

| <b>Factor</b>                                   | <b><i>ent-16(RS)-9-epi-ST-<math>\Delta^{14}</math>-10-PhytoF</i></b> | <b><i>ent-9(RS)-12-epi-ST-<math>\Delta^{10}</math>-13-PhytoF</i></b> | <b><i>ent-16(RS)-13-epi-ST-<math>\Delta^{14}</math>-9-PhytoF</i></b> |
|-------------------------------------------------|----------------------------------------------------------------------|----------------------------------------------------------------------|----------------------------------------------------------------------|
| <i>Unripe grains</i>                            |                                                                      |                                                                      |                                                                      |
| Control                                         | 19.3 $\pm$ 2.1 a                                                     | 3.2 $\pm$ 0.3 a                                                      | 13.8 $\pm$ 2.3 a                                                     |
| SA1                                             | 16.8 $\pm$ 1.6 a                                                     | 2.9 $\pm$ 0.3 a                                                      | 12.5 $\pm$ 1.9 a                                                     |
| SA15                                            | 15.2 $\pm$ 1.7 a                                                     | 2.9 $\pm$ 0.3 a                                                      | 9.6 $\pm$ 1.1 a                                                      |
| <i>Mature grains</i>                            |                                                                      |                                                                      |                                                                      |
| Control                                         | 18.1 $\pm$ 3.3 a                                                     | 4.5 $\pm$ 0.7 a                                                      | 11.0 $\pm$ 2.1 a                                                     |
| SA1                                             | 13.3 $\pm$ 1.3 ab                                                    | 3.0 $\pm$ 0.4 b                                                      | 7.5 $\pm$ 0.8 b                                                      |
| SA15                                            | 11.6 $\pm$ 1.5 b                                                     | 3.1 $\pm$ 0.5 b                                                      | 6.0 $\pm$ 0.7 b                                                      |
| <i>Interaction harvest time by SA treatment</i> |                                                                      |                                                                      |                                                                      |
| <i>p</i> -value                                 | N.s.                                                                 | N.s.                                                                 | N.s.                                                                 |

Control, without salicylic acid; SA1 and SA15, application with 1 and 15 mM of salicylic acid. Concentration PhytoFs (ng.g<sup>-1</sup> dw) presented as mean  $\pm$  SEM (n=3). <sup>x</sup> Values in the same row followed by different letters are significantly different at p<0.05 according to one-way analysis of variance (ANOVA) and multiple range test of Tukey for salicylic acid treatments in unripe and mature grain of three rice genotypes. <sup>y</sup> N.s., no significant (p<0.05).
